# Supplementary material for: The Himalayan uplift and evolution of aquatic biodiversity across Asia: Snowtrout (Cyprininae: Schizothorax) as a test case
Source: PubMed Central journal article supplement (PMC10597529; doi:10.1371/journal.pone.0289736), 2023-10-24

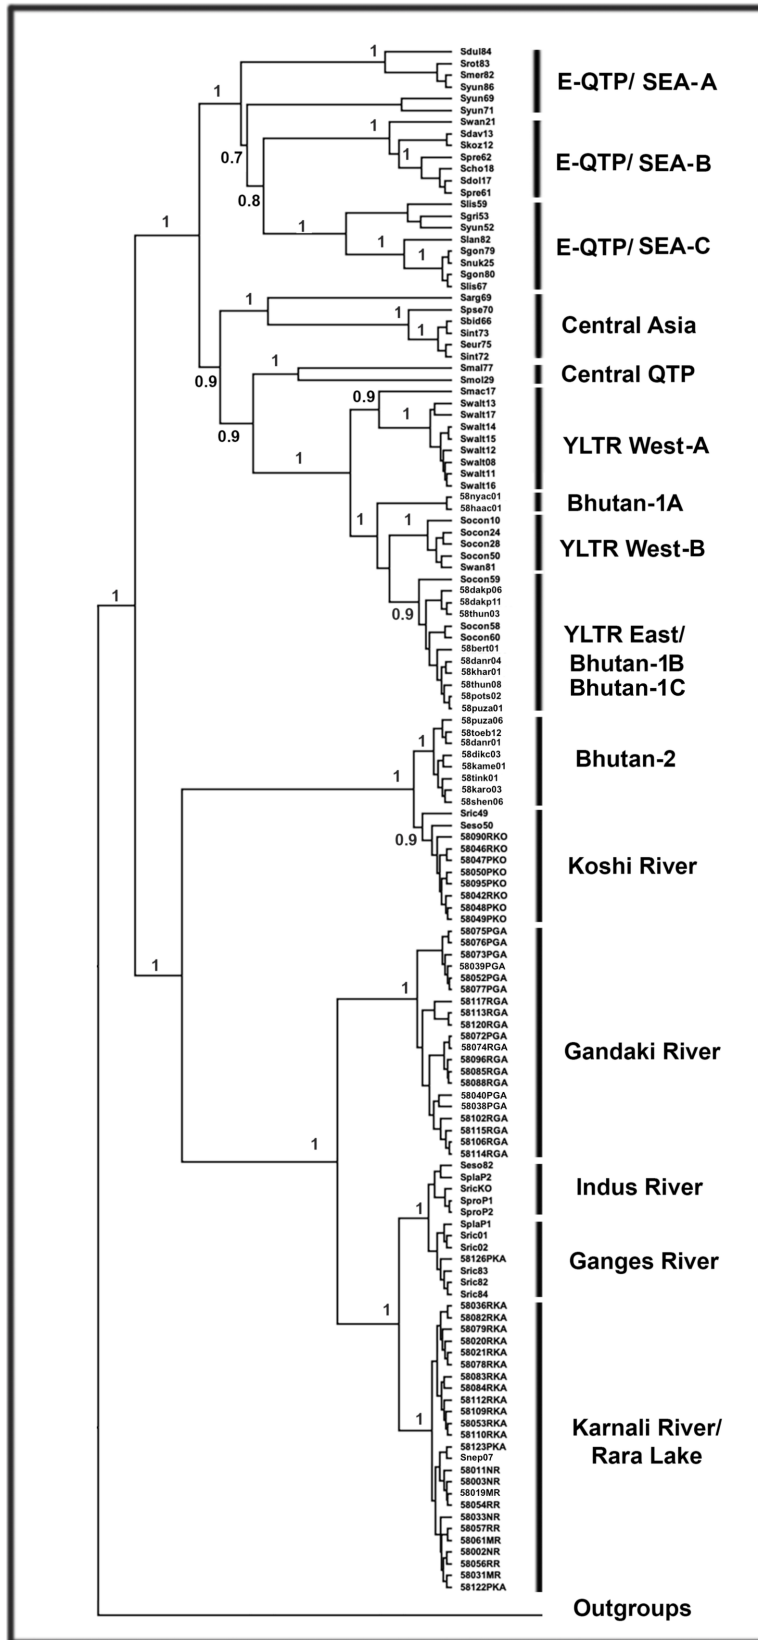

Supplement: pone.0289736.s005.pdf [file pone.0289736.s005.pdf]
